# Supplementary material for: Hydride Generation on the Cu-Doped CeO2(111) Surface and Its Role in CO2 Hydrogenation Reactions
Source: MDPI journal article supplement (doi:10.3390/catal12090963), 2022-08-29
Supplement: s1 [file s1]

# Hydride Generation on the Cu-Doped CeO<sub>2</sub>(111) Surface and Its Role in CO<sub>2</sub> Hydrogenation Reactions

Zhi-Qiang Wang <sup>1,†</sup>, Hui-Hui Liu <sup>1,†</sup>, Xin-Ping Wu <sup>1,\*</sup>, Peijun Hu <sup>1,2</sup> and Xue-Qing Gong <sup>1,\*</sup>

<sup>1</sup> Key Laboratory for Advanced Materials and Joint International Research Laboratory for Precision Chemistry and Molecular Engineering, Feringa Nobel Prize Scientist Joint Research Center, Centre for Computational Chemistry and Research Institute of Industrial Catalysis, School of Chemistry and Molecular Engineering, East China University of Science and Technology, 130 Meilong Road, Shanghai 200237, China; zhiqiangwang@ecust.edu.cn (Z.-Q.W.); liuhuihui@ecust.edu.cn (H.-H.L.); p.hu@qub.ac.uk (P.H.)

<sup>2</sup> School of Chemistry and Chemical Engineering, The Queen's University of Belfast, Belfast BT9 5AG, UK

\* Correspondence: xpwu@ecust.edu.cn (X.-P.W.); xgong@ecust.edu.cn (X.-Q.G.)

† These authors contributed equally to this work.

**Table S1.** Calculated lattice constants of bulk ceria by using different plane wave kinetic energy cut-offs.

| kinetic Energy Cut-offs | Lattice Parameters / Å |       |       |
|-------------------------|------------------------|-------|-------|
|                         | a                      | b     | c     |
| 350                     | 5.393                  | 5.393 | 5.393 |
| 400                     | 5.456                  | 5.456 | 5.456 |
| 450                     | 5.488                  | 5.488 | 5.488 |

**Table S2.** Calculated lattice constants of bulk ceria by using different *k*-point meshes.

| <i>k</i> -point Mesh | Lattice Parameters / Å |       |       |
|----------------------|------------------------|-------|-------|
|                      | a                      | b     | c     |
| 3×3×3                | 5.449                  | 5.449 | 5.449 |
| 5×5×5                | 5.456                  | 5.456 | 5.456 |
| 7×7×7                | 5.456                  | 5.456 | 5.456 |
| 9×9×9                | 5.456                  | 5.456 | 5.456 |

**Table S3.** Calculated Bader charges of the Cu<sup>2+</sup> of CuO and the Cu<sup>1+</sup> of Cu<sub>2</sub>O.

|                   | Cu <sup>2+</sup> (CuO) | Cu <sup>1+</sup> (Cu <sub>2</sub> O) |
|-------------------|------------------------|--------------------------------------|
| Bader Charge /  e | 0.974                  | 0.541                                |

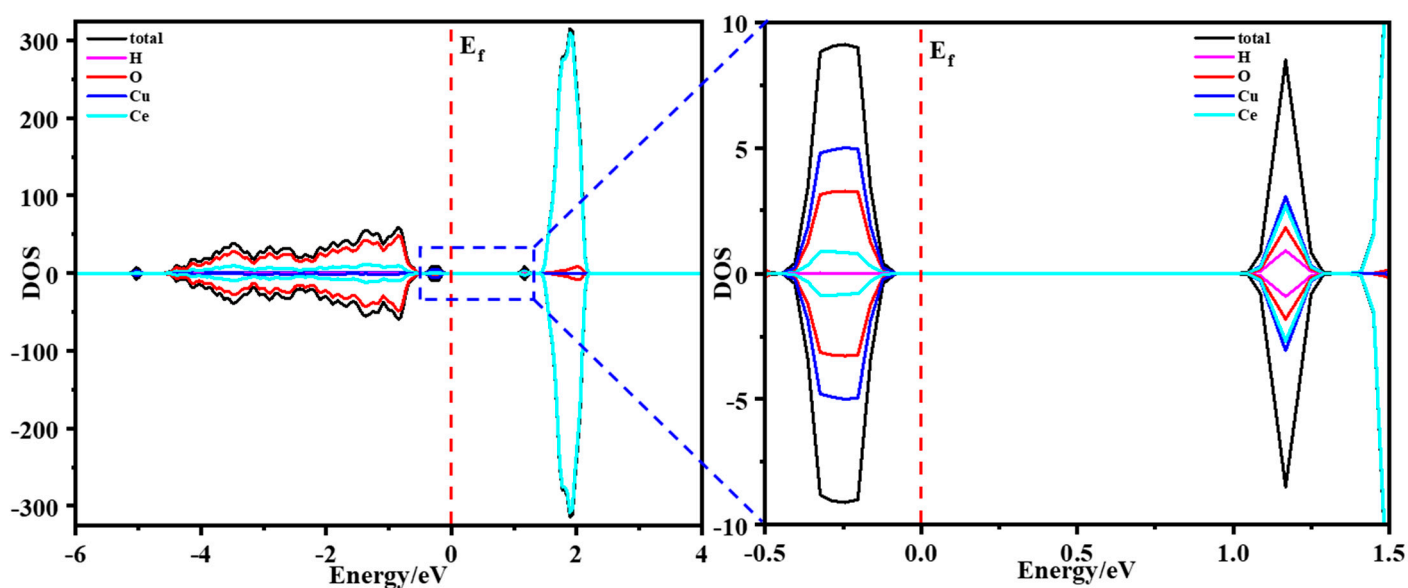

**Figure S1.** Calculated density of states (DOS) of the Cu/CeO<sub>2</sub>(111) surface with H being adsorbed at the Cu site.

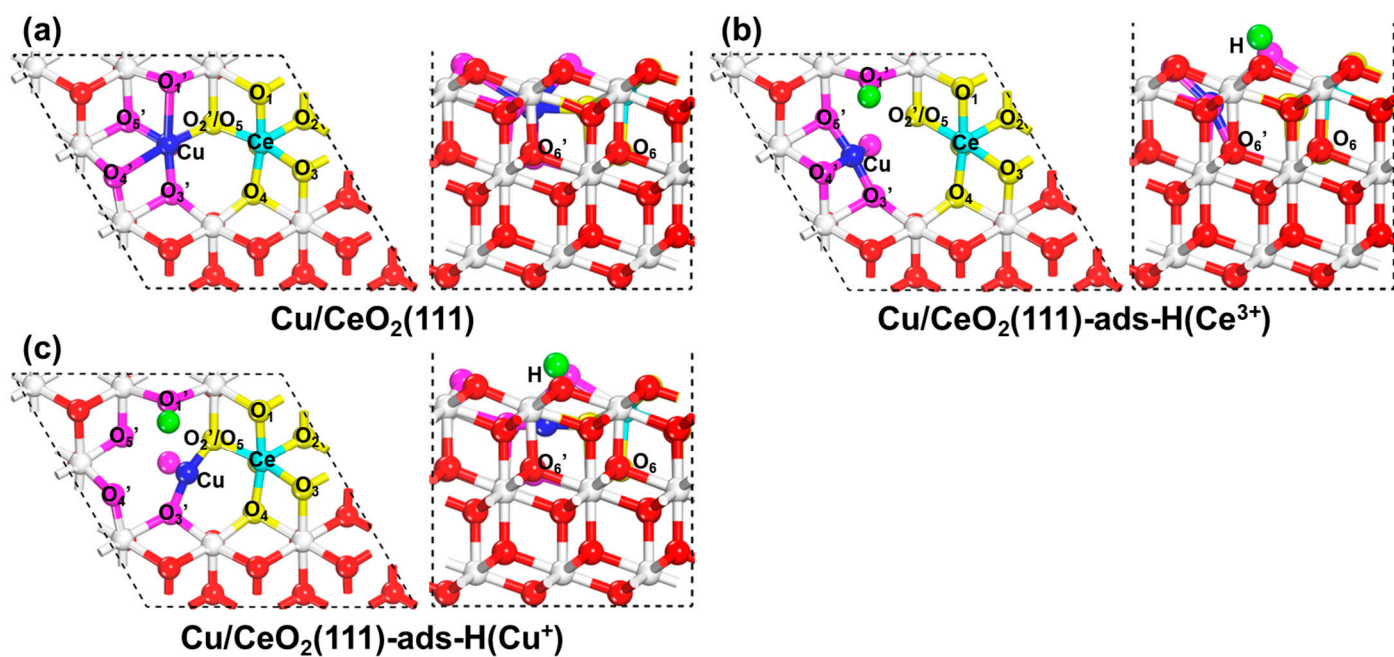

**Figure S2.** Calculated structures (left: side view; right: top view) of (a) Cu/CeO<sub>2</sub>(111); calculated structures of Cu/CeO<sub>2</sub>(111) with H being adsorbed at the O site and the electron is localized at (b) the Ce site and (c) the Cu site. Red: O atoms; white and aquamarine: Ce atoms; blue: Cu atoms; green: H atoms; yellow: neighboring oxygen atoms of the Ce; pink: neighboring oxygen atoms of the Cu.

**Table S4.** Calculated Bader charges of the Cu and Ce species and their nearby O; calculated Cu-O and Ce-O bond distances, and the electrostatic interaction energies ( $E_{Cu+Ce}$ ) between the Cu and Ce and their nearby species on the Cu/CeO<sub>2</sub>(111) and the Cu/CeO<sub>2</sub>(111) surface with H being adsorbed at the O site; calculated Cu coordinate numbers on the Cu/CeO<sub>2</sub>(111) and the Cu/CeO<sub>2</sub>(111) surface with H being adsorbed at the O site (the corresponding structures are illustrated in Figure S2).

|                           | Ce /  e                 | O <sub>1</sub> /  e     | O <sub>2</sub> /  e     | O <sub>3</sub> /  e     | O <sub>4</sub> /  e     | O <sub>5</sub> /  e     | O <sub>6</sub> /  e   |
|---------------------------|-------------------------|-------------------------|-------------------------|-------------------------|-------------------------|-------------------------|-----------------------|
| Cu/CeO <sub>2</sub> (111) | 2.351                   | -1.196                  | -1.194                  | -1.196                  | -1.229                  | -1.191                  | -1.227                |
| Ads-H(Ce <sup>3+</sup> )  | 2.071                   | -1.220                  | -1.236                  | -1.220                  | -1.255                  | -1.200                  | -1.210                |
| Ads-H(Cu <sup>1+</sup> )  | 2.311                   | -1.200                  | -1.196                  | -1.184                  | -1.230                  | -1.182                  | -1.220                |
|                           | Cu /  e                 | O <sub>1</sub> ' /  e   | O <sub>2</sub> ' /  e   | O <sub>3</sub> ' /  e   | O <sub>4</sub> ' /  e   | O <sub>5</sub> ' /  e   | O <sub>6</sub> ' /  e |
| Cu/CeO <sub>2</sub> (111) | 1.044                   | -1.102                  | -1.191                  | -1.193                  | -1.104                  | -1.131                  | -1.130                |
| Ads-H(Ce <sup>3+</sup> )  | 0.998                   | -1.285                  | -1.200                  | -1.153                  | -1.109                  | -1.122                  | -1.143                |
| Ads-H(Cu <sup>1+</sup> )  | 0.656                   | -1.093                  | -1.182                  | -1.173                  | -1.105                  | -1.141                  | -1.173                |
|                           | Ce-O <sub>1</sub> / Å   | Ce-O <sub>2</sub> / Å   | Ce-O <sub>3</sub> / Å   | Ce-O <sub>4</sub> / Å   | Ce-O <sub>5</sub> / Å   | Ce-O <sub>6</sub> / Å   | $E_{Cu+Ce}$ / eV      |
| Cu/CeO <sub>2</sub> (111) | 2.279                   | 2.231                   | 2.344                   | 2.318                   | 2.297                   | 2.316                   | -151.39               |
| Ads-H(Ce <sup>3+</sup> )  | 2.456                   | 2.300                   | 2.505                   | 2.430                   | 2.392                   | 2.412                   | -134.05               |
| Ads-H(Cu <sup>1+</sup> )  | 2.289                   | 2.241                   | 2.315                   | 2.337                   | 2.296                   | 2.318                   | -130.40               |
|                           | Cu-O <sub>1</sub> ' / Å | Cu-O <sub>2</sub> ' / Å | Cu-O <sub>3</sub> ' / Å | Cu-O <sub>4</sub> ' / Å | Cu-O <sub>5</sub> ' / Å | Cu-O <sub>6</sub> ' / Å | Cu Coordinate Number  |
| Cu/CeO <sub>2</sub> (111) | 3.133                   | 2.151                   | 2.148                   | 3.133                   | 1.956                   | 1.909                   | 4                     |
| Ads-H(Ce <sup>3+</sup> )  | 3.825                   | 3.250                   | 1.934                   | 1.970                   | 1.932                   | 1.985                   | 4                     |
| Ads-H(Cu <sup>1+</sup> )  | 3.648                   | 1.868                   | 1.868                   | 3.753                   | 3.216                   | 2.133                   | 3                     |

As it has been explained in the previous work [27,38], the electrostatic interaction energy between the Cu and Ce species and its nearby species,  $E_{Cu+Ce}$ , on the Cu/CeO<sub>2</sub>(111) and the Cu/CeO<sub>2</sub>(111) surface with H being adsorbed at the O site can be calculated as:

$$E_{Cu+Ce} = \sum_{i=1}^N \frac{q_{Ce} * q_O}{4 * \pi * \epsilon_0 * d_{Ce-O}} + \sum_{i=1}^N \frac{q_{Cu} * q_O}{4 * \pi * \epsilon_0 * d_{Cu-O}} \quad (S1)$$

where  $q$  is the calculated Bader charge,  $d$  is the bond distance (between Cu or Ce and nearby oxygen species), and  $\epsilon_0$  is the vacuum permittivity (i.e.,  $8.854187817 \times 10^{-12}$  F/m).

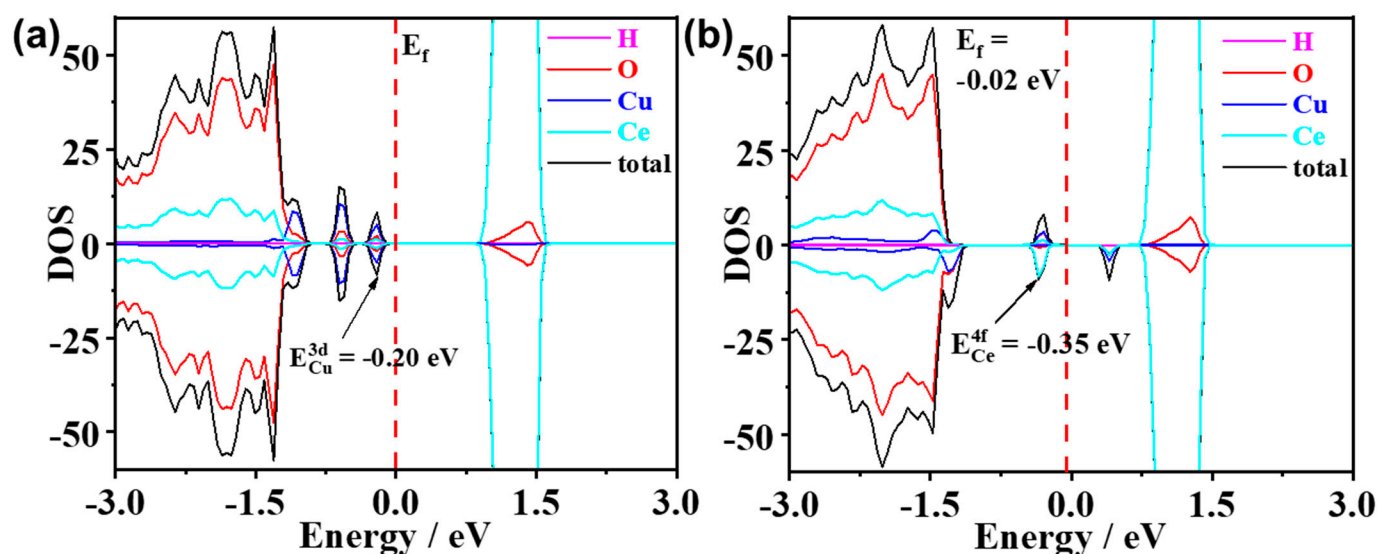

**Figure S3.** Calculated density of states (DOS) of the Cu/CeO<sub>2</sub>(111) surface with H being adsorbed at the O site, (a) the electron is localized at the Cu site and (b) the electron is localized at the Ce site. All DOS are aligned with respect to the non-interacting O 2s orbital of a fixed bottom O atom of surface slabs.

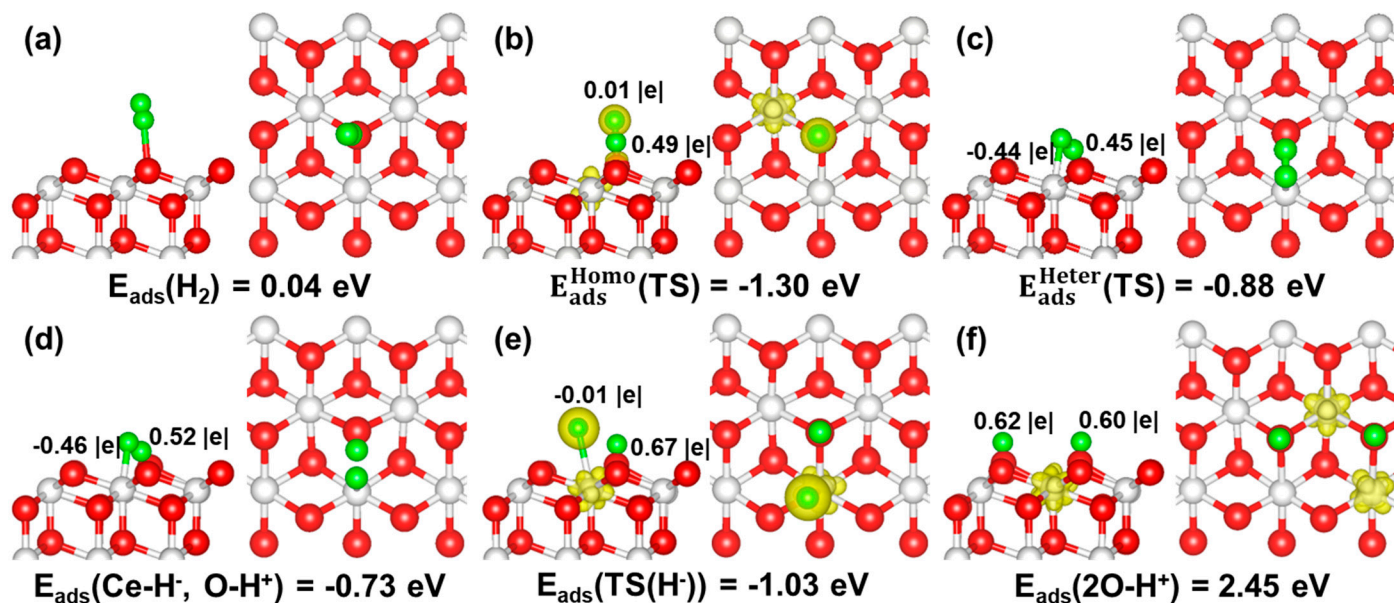

**Figure S4.** Calculated structures of H<sub>2</sub> adsorption and dissociation on the CeO<sub>2</sub>(111) surface. (a) H<sub>2</sub> adsorption, (b) transition state for H<sub>2</sub> homolytic dissociation, (c) transition state for H<sub>2</sub> heterolytic dissociation, (d) co-adsorption of H<sup>+</sup> and H<sup>-</sup>, (e) transition state for the hydride migration to the adjacent oxygen site, (f) co-adsorption of two surface H<sup>+</sup> on the oxygen sites. The corresponding adsorption energies and the Bader charges of the H species are also shown.

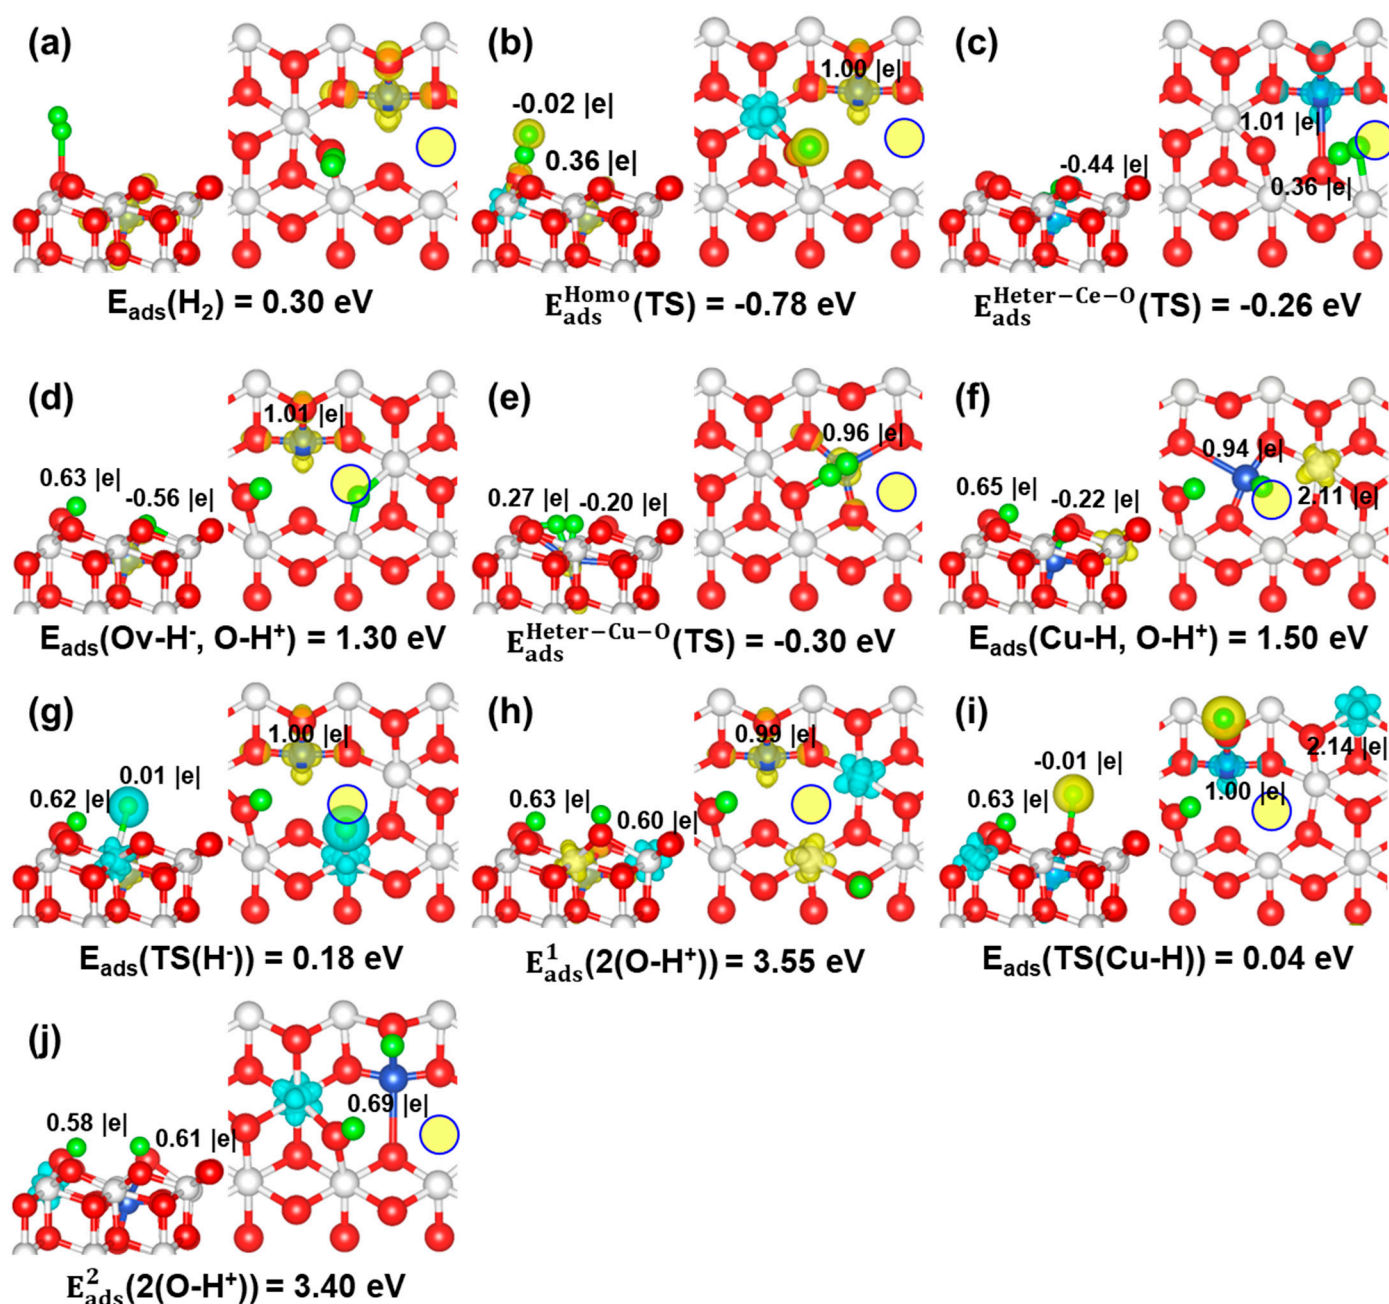

**Figure S5.** Calculated structures of  $\text{H}_2$  adsorption and dissociation on the  $\text{Cu}/\text{CeO}_2(111)$  surface. (a)  $\text{H}_2$  adsorption, (b) transition state for  $\text{H}_2$  homolytic dissociation, (c) transition state for  $\text{H}_2$  heterolytic dissociation above the  $\text{Ce-O}$  bond, (d) co-adsorption of  $\text{H}^+$  and  $\text{H}^-$ , (e) transition state for  $\text{H}_2$  heterolytic dissociation above the  $\text{Cu-O}$  bond, (f) co-adsorption of  $\text{H}^+$  and  $\text{Cu-H}$ , (g) transition state for the hydride migration to the adjacent  $\text{O}_{2c}$  site, (h) co-adsorption of two surface  $\text{H}^+$  on two  $\text{O}_{2c}$  sites, (i) transition state for the  $(\text{Cu-})\text{H}$  migration to the adjacent  $\text{O}_{3c}$  site, (j) co-adsorption of two surface  $\text{H}^+$  on the  $\text{O}_{2c}$  and  $\text{O}_{3c}$  sites. The corresponding adsorption energies and the Bader charges of the  $\text{H}$ ,  $\text{Cu}$  and  $\text{Ce}$  species are also shown.



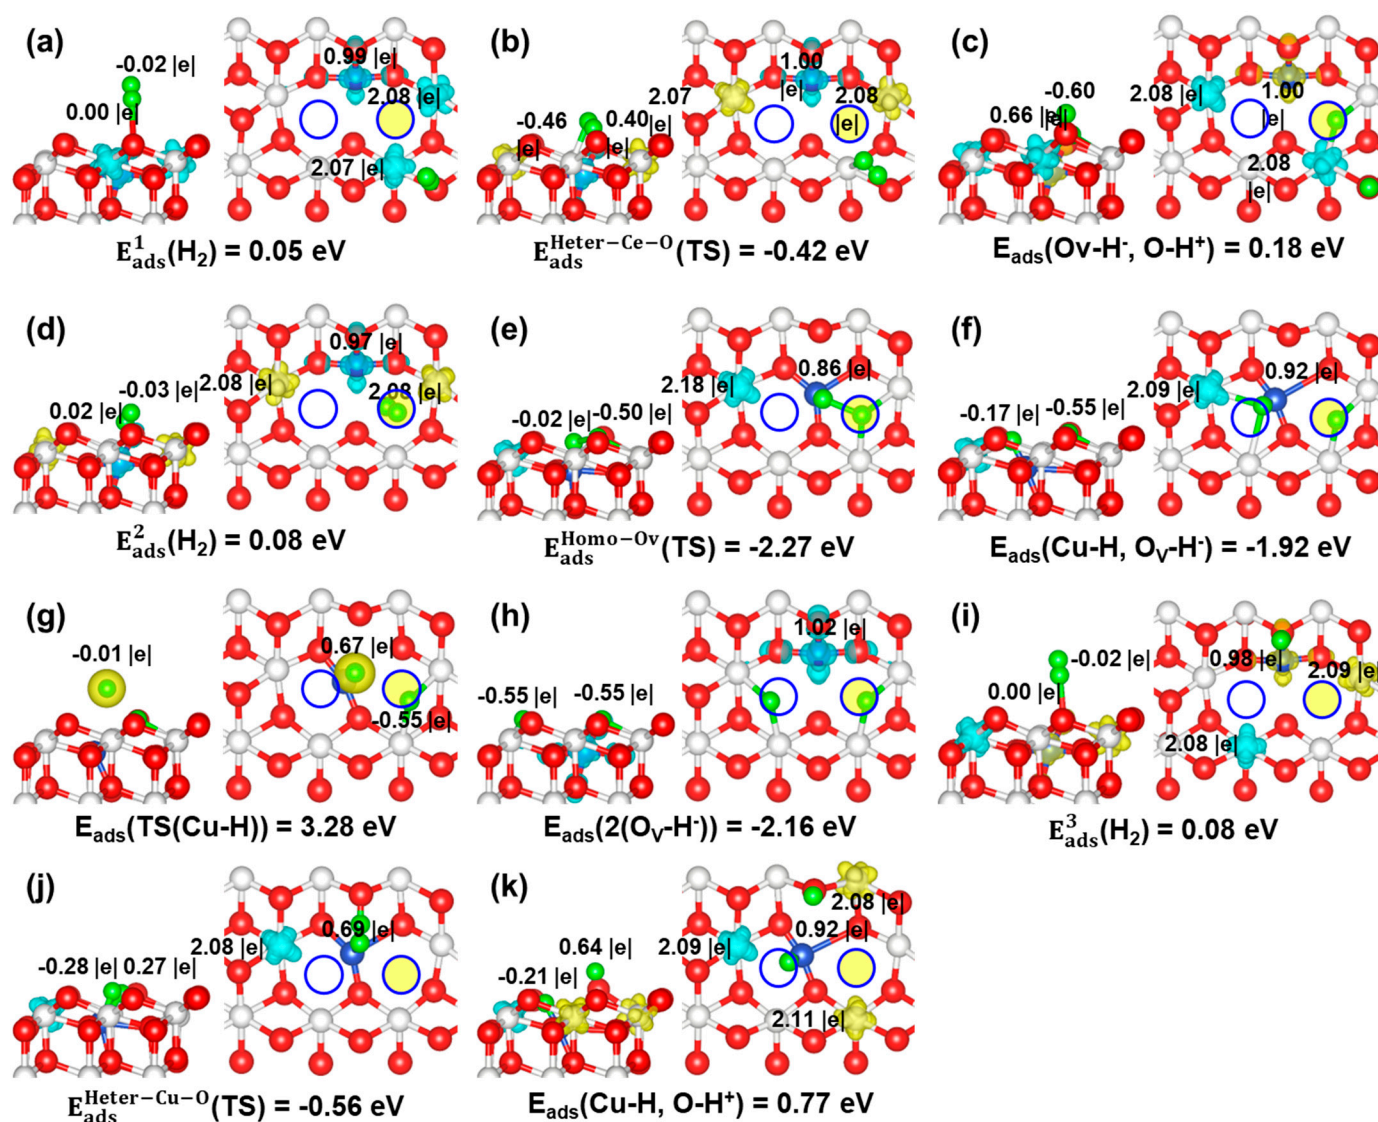

**Figure S6.** Calculated structures of  $\text{H}_2$  adsorption and dissociation on the  $\text{Cu}/\text{CeO}_2(111)\text{-Ov}$  surface. (a)  $\text{H}_2$  adsorption on the oxygen site, (b) transition state for  $\text{H}_2$  heterolytic dissociation above the Ce-O bond, (c) co-adsorption of  $\text{H}^+$  and  $\text{H}^-$ , (d)  $\text{H}_2$  adsorption on the Ov site, (e) transition state for  $\text{H}_2$  homolytic dissociation, (f) co-adsorption of  $\text{H}^-$  and  $(\text{Cu})\text{-H}$ , (g) transition state for the  $(\text{Cu})\text{-H}$  migration to the adjacent Ov site, (h) co-adsorption of two  $\text{H}^-$  on two Ov sites, (i)  $\text{H}_2$  adsorption above the Cu-O bond, (j) transition state for  $\text{H}_2$  heterolytic dissociation above the Cu-O bond, (k) co-adsorption of  $\text{H}^+$  and  $(\text{Cu})\text{-H}$ . The corresponding adsorption energies and the Bader charges of the H, Cu and Ce species are also shown.

### Crystal Reduction Potential ( $V_r$ ) [57].

In the same spirit as  $V_r$  extends useful concepts from atomic/molecular (electro)chemistry, such as ionization energies ( $E_i$ ) and standard reduction potentials ( $V^\circ$ ), to the solid state by consistently including crystal field effects and removing any solvation effects in an aqueous (or other liquid) medium, we defined the reduction potential ( $V_r$ ) for  $\text{M}^{n+} \rightarrow \text{M}^{m+}$  (where  $n > m$ ) as:

$$V_r[\text{M}^{n+} \rightarrow \text{M}^{m+}] = -E_r[\text{M}^{n+} \rightarrow \text{M}^{m+}] / (n - m)F \quad (\text{S2})$$

where  $n$  and  $m$  are the oxidation states of the metals in the ground-state polymorphs of metal-oxide crystals  $\text{MO}_{n/2}$  and  $\text{MO}_{m/2}$ , respectively,  $F$  is the Faraday constant, and  $E_r[\text{M}^{n+} \rightarrow \text{M}^{m+}]$  can be calculated as follows:

$$E_r[M^{n+} \rightarrow M^{m+}] = E^{\text{SCAN+U}}[\text{MO}_{m/2}] + (n - m)E^{\text{SCAN}}[\text{O}_2]/4 - E^{\text{SCAN+U}}[\text{MO}_{n/2}] \quad (\text{S3})$$

Note that  $V_r$  in eq 2 is strictly defined for the Gibbs energy ( $G$ ) of reduction. Here we ignored the PV and entropic effects, and  $G$  can be approximated as the DFT energy (*i.e.*,  $G \approx E$ ). Then, the calculated  $V_r$  value are:  $V_r[\text{Ce}^{4+} \rightarrow \text{Ce}^{3+}] = -1.77$  V and  $V_r[\text{Cu}^{2+} \rightarrow \text{Cu}^+] = -1.43$  V.

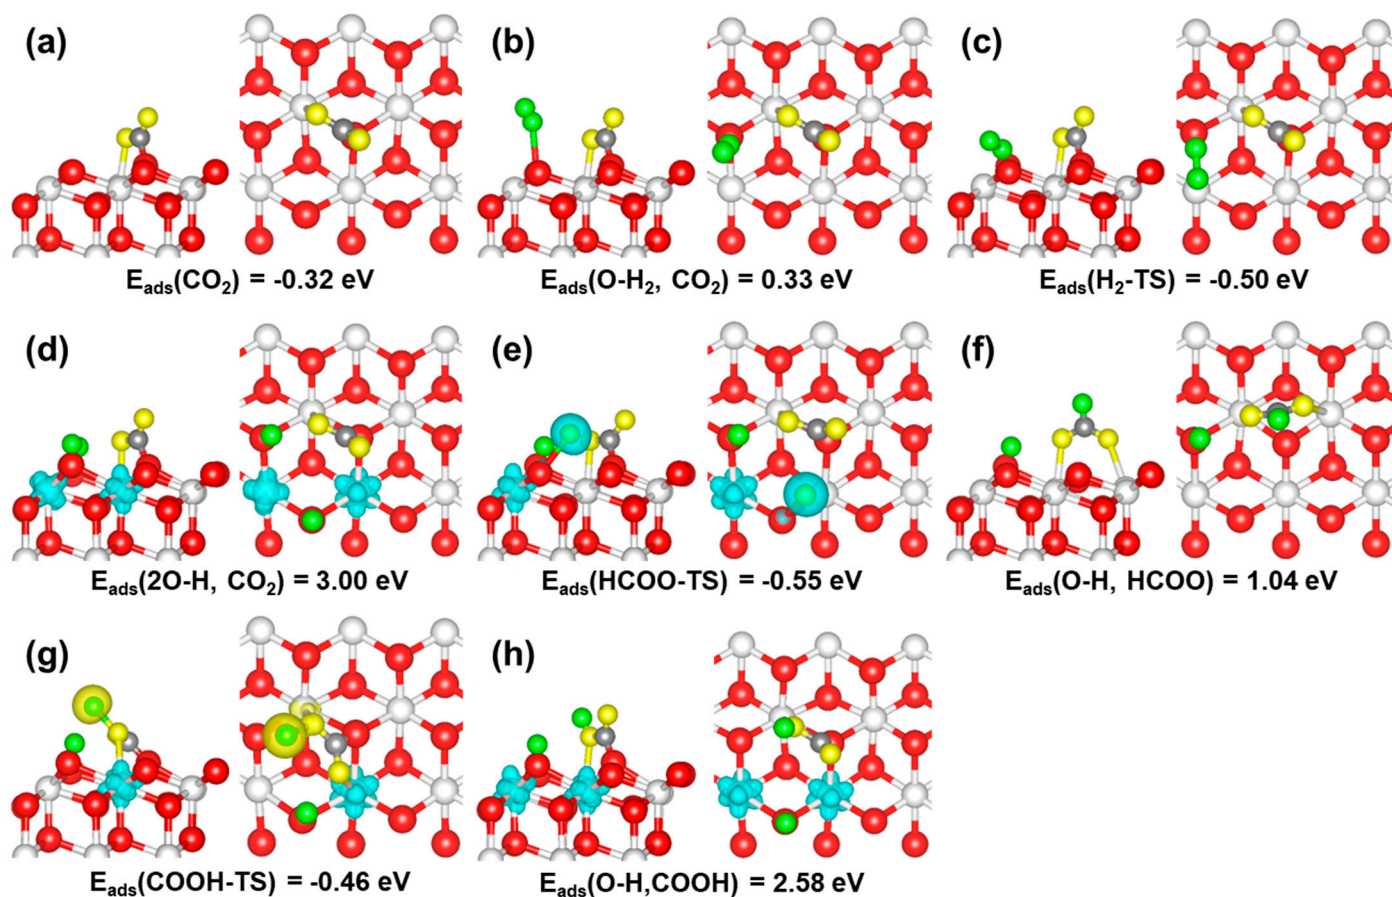

**Figure S7.** Calculated structures of the (a)  $\text{CO}_2$  adsorption, (b)  $\text{CO}_2$  and  $\text{H}_2$  co-adsorption, (c) transition state for  $\text{H}_2$  dissociation, (d) dissociated  $\text{H}_2$ , (e) transition state of  $\text{CO}_2$  hydrogenation to  $\text{HCOO}$ , (f) co-adsorbed (O)-H and  $\text{HCOO}$ , (g) transition state of  $\text{CO}_2$  hydrogenation to  $\text{COOH}$ , (h) co-adsorbed (O)-H and  $\text{COOH}$  on the  $\text{CeO}_2(111)$  surface. The corresponding adsorption energies and the spin density distributions are also shown.

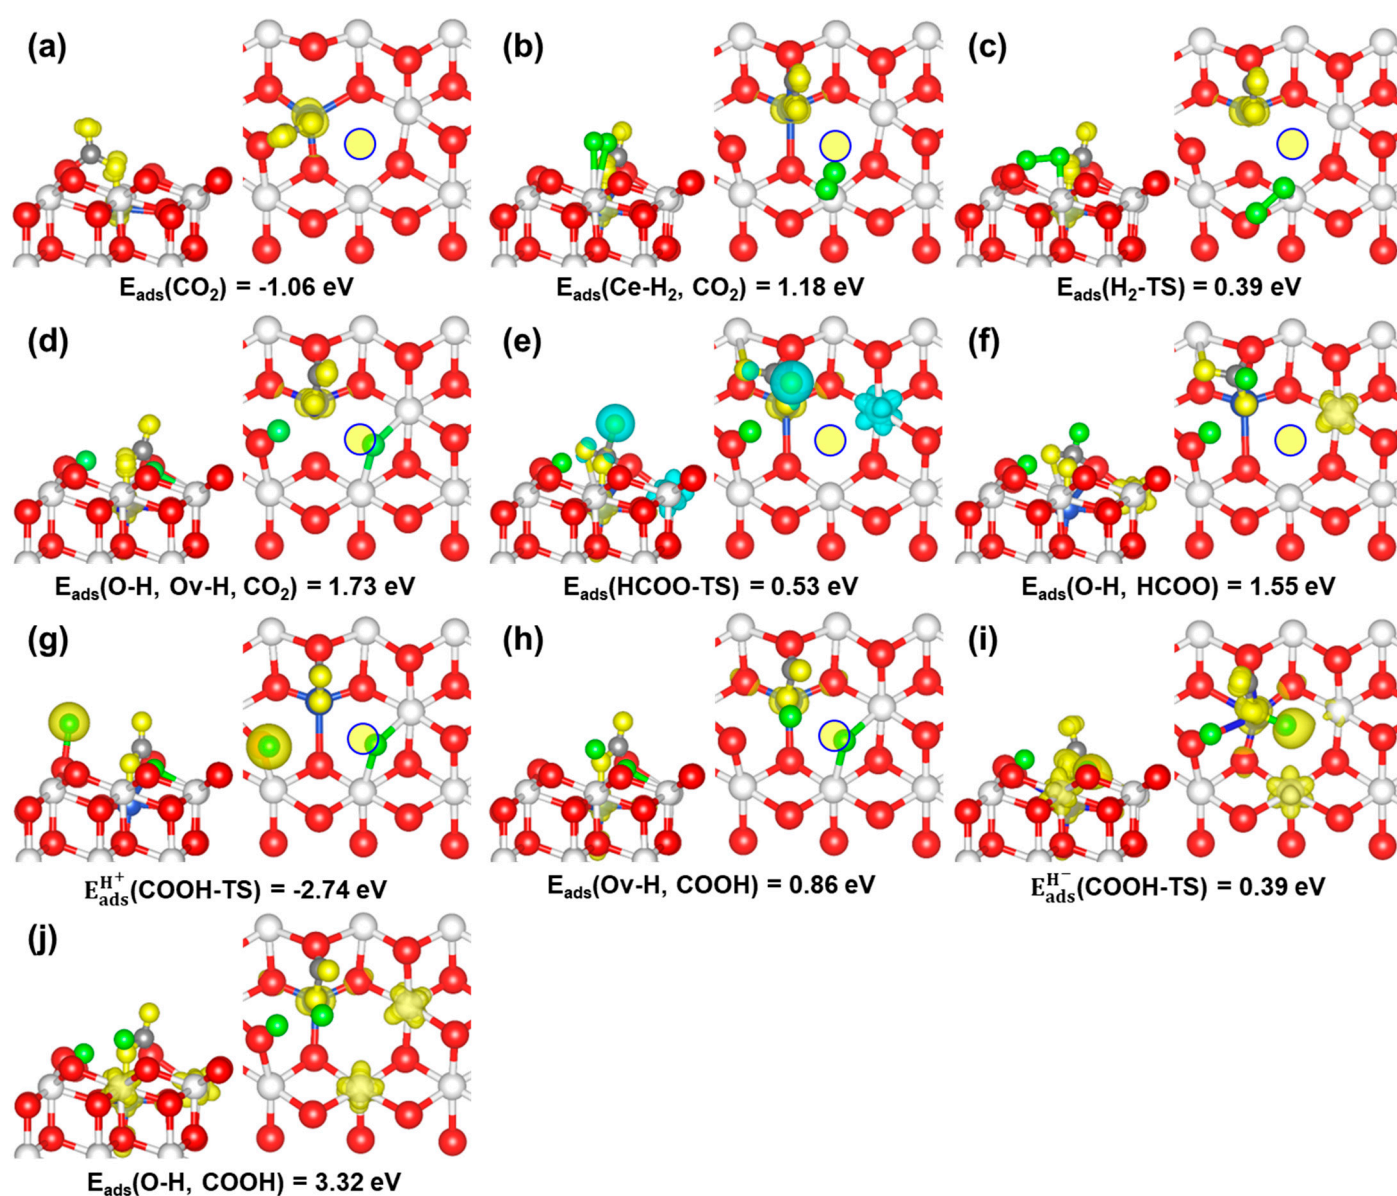

**Figure S8.** Calculated structures of the (a) CO<sub>2</sub> adsorption, (b) CO<sub>2</sub> and H<sub>2</sub> co-adsorption, (c) transition state for H<sub>2</sub> dissociation, (d) dissociated H<sub>2</sub>, (e) transition state of CO<sub>2</sub> hydrogenation to HCOO, (f) co-adsorbed (O-)H and HCOO, (g) transition state of CO<sub>2</sub> hydrogenation (by H<sup>+</sup>) to COOH, (h) co-adsorbed (Ov-)H and COOH, (i) transition state of CO<sub>2</sub> hydrogenation (by H<sup>-</sup>) to COOH, (j) co-adsorbed (O-)H and COOH on the Cu/CeO<sub>2</sub>(111) surface. The corresponding adsorption energies and the spin density distributions are also shown.
