# Supplementary material for: Hydride Generation on the Cu-Doped CeO2(111) Surface and Its Role in CO2 Hydrogenation Reactions
Source: MDPI journal article supplement (doi:10.3390/catal12090963), 2022-08-29
Supplement: s1 [file s1]

Archive with 1 entries (1 files):
- catalysts-1840022-supplementary.pdf
